# Supplementary material for: Syntheses, structures, and magnetic properties of a series of Mn–M–Mn trinuclear complexes with different spin configurations
Source: Royal Society of Chemistry journal article supplement (doi:10.1039/d1dt03030b), 2021-11-30
Supplement: d1dt03030b1.pdf [file d1dt03030b1.pdf]

## Supporting Information

### Syntheses, structures, and magnetic properties of a series of trinuclear complexes with different spin configurations

Takuya Shiga,<sup>\*a</sup> Honami Ito,<sup>a</sup> Nozomi Mihara<sup>a</sup> and Masayuki Nihei<sup>a</sup>

- a. Degree Programs in Pure and Applied Sciences, Graduate School of Science and Technology, University of Tsukuba, Tennodai 1-1-1, Tsukuba, Ibaraki 305-8571, Japan.

Corresponding author

Dr. Takuya Shiga

Degree Programs in Pure and Applied Sciences, Graduate School of Science and Technology,

University of Tsukuba

Tennodai 1-1-1, Tsukuba, Ibaraki 305-8571 (Japan)

TEL: (+81)29-852-4426

FAX: (+81)29-852-4426

E-mail:

[shiga@chem.tsukuba.ac.jp](mailto:shiga@chem.tsukuba.ac.jp)

## Contents

**Figure S1** Molecular structures of Mn<sub>3</sub>–Gd<sub>2</sub>–Mn<sub>4</sub> trinuclear moiety of **2** (top) and its core (bottom).

**Figure S2** Field dependences of magnetization for **1'** (top) and the reduced magnetization curves (bottom).

**Figure S3** The  $\chi_m T$  versus  $T$  plots of complex **2'**.

**Figure S4** Field dependences of magnetization for **2'** (top) and the reduced magnetization curves (bottom).

**Figure S5** Field dependences of magnetization for **3'** (top) and the reduced magnetization curves (bottom).

**Figure S6** Calculated  $-\Delta S_m$  over a range of fields for **1'**. The maximum value is 12.3 J kg<sup>-1</sup> K<sup>-1</sup>, calculated for 0 – 5 T at 2.3 K.

**Figure S7** Calculated  $-\Delta S_m$  over a range of fields for **3'**. The maximum value is 8.0 J kg<sup>-1</sup> K<sup>-1</sup>, calculated for 0 – 5 T at 2.4 K.

**Table S1** Representative 3d-4f complexes exhibiting large  $-\Delta S_m$  values.

**Table S2** Crystal parameters of **1**, **2** and **3**.

**Table S3** Selected bond lengths and angles for all complexes.

**Table S4** Bond valence sum calculations for all complexes.

## References

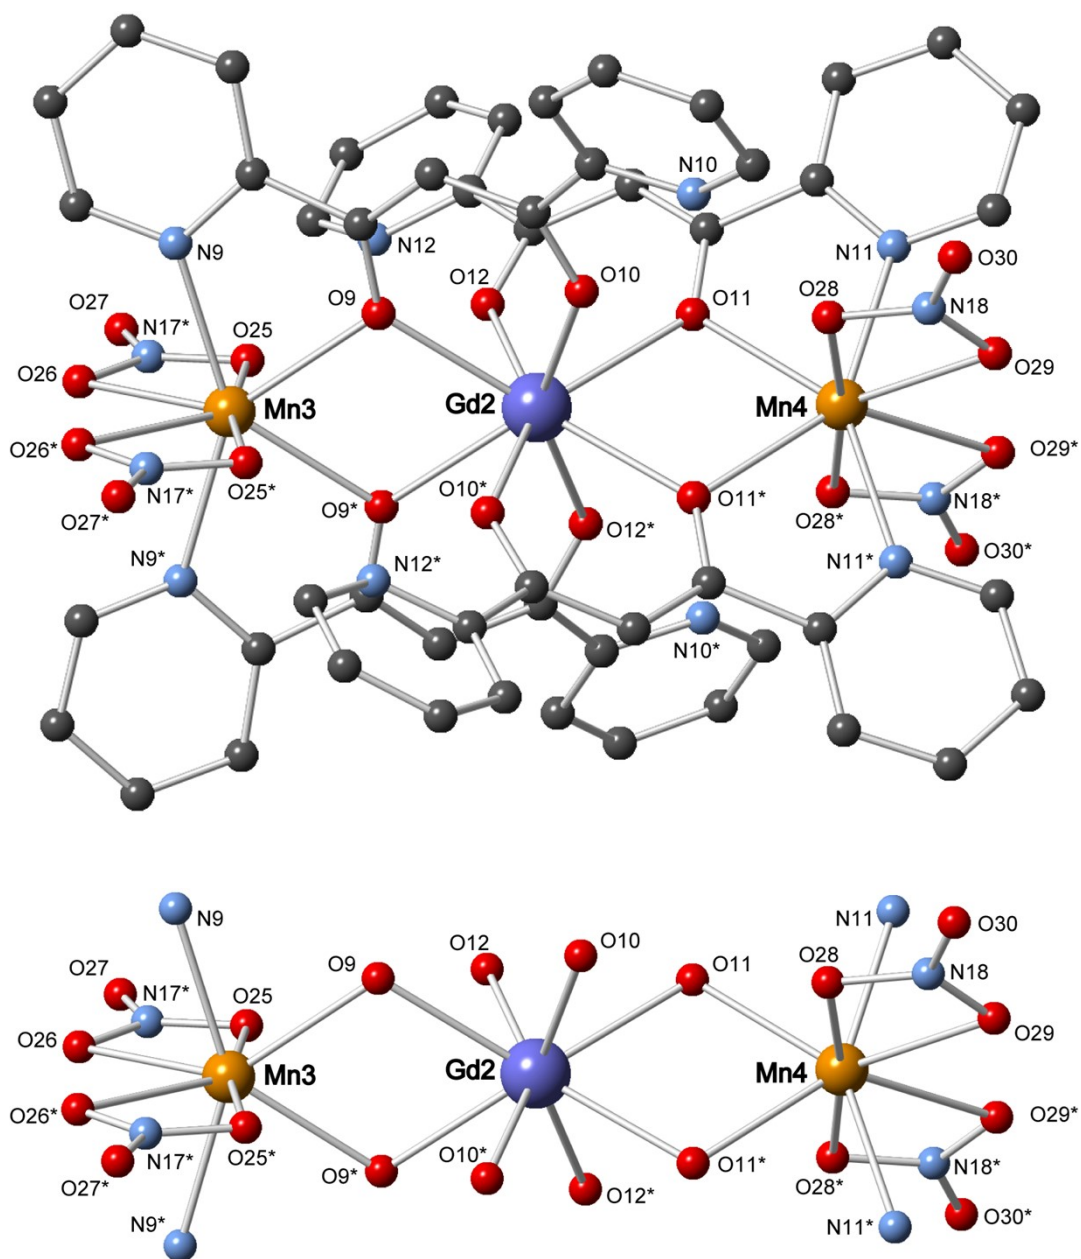

**Figure S1.** Molecular structures of Mn3–Gd2–Mn4 trinuclear moiety **2** (top) and its core (bottom).

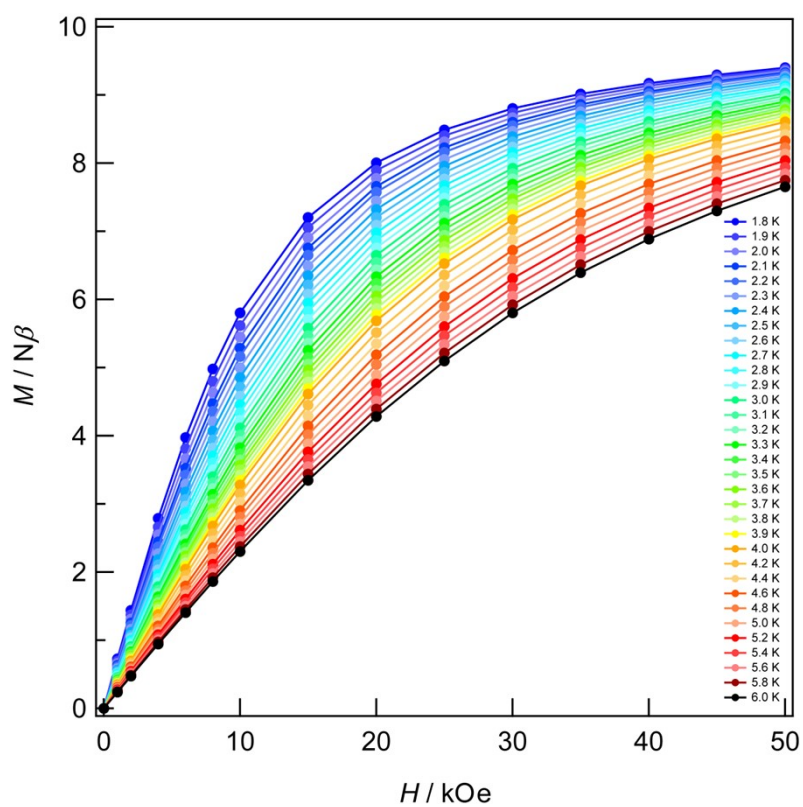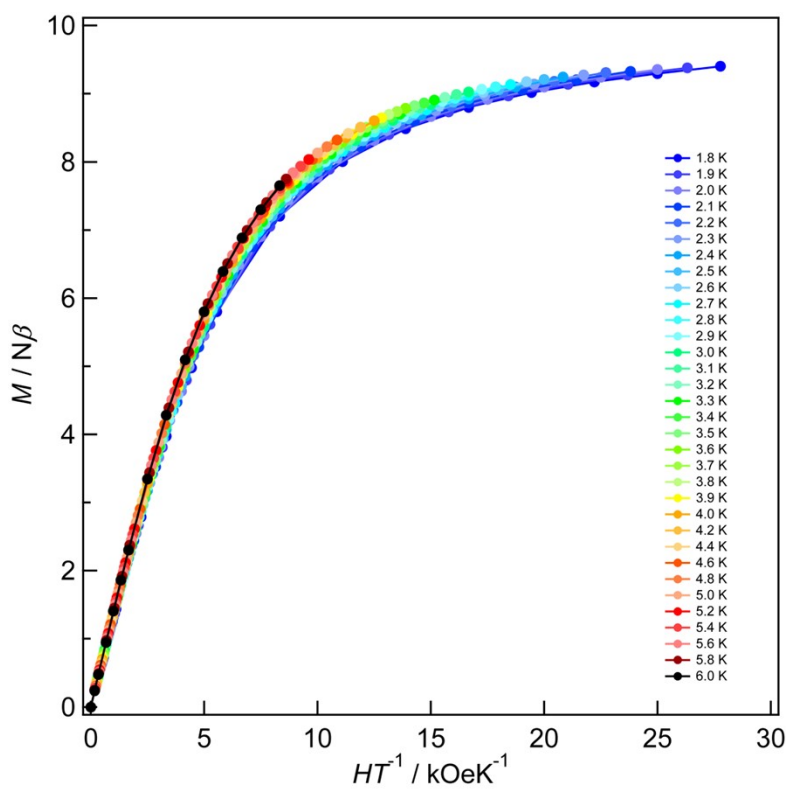

**Figure S2.** Field dependences of magnetization for **1'** (top) and the reduced magnetization curves (bottom).

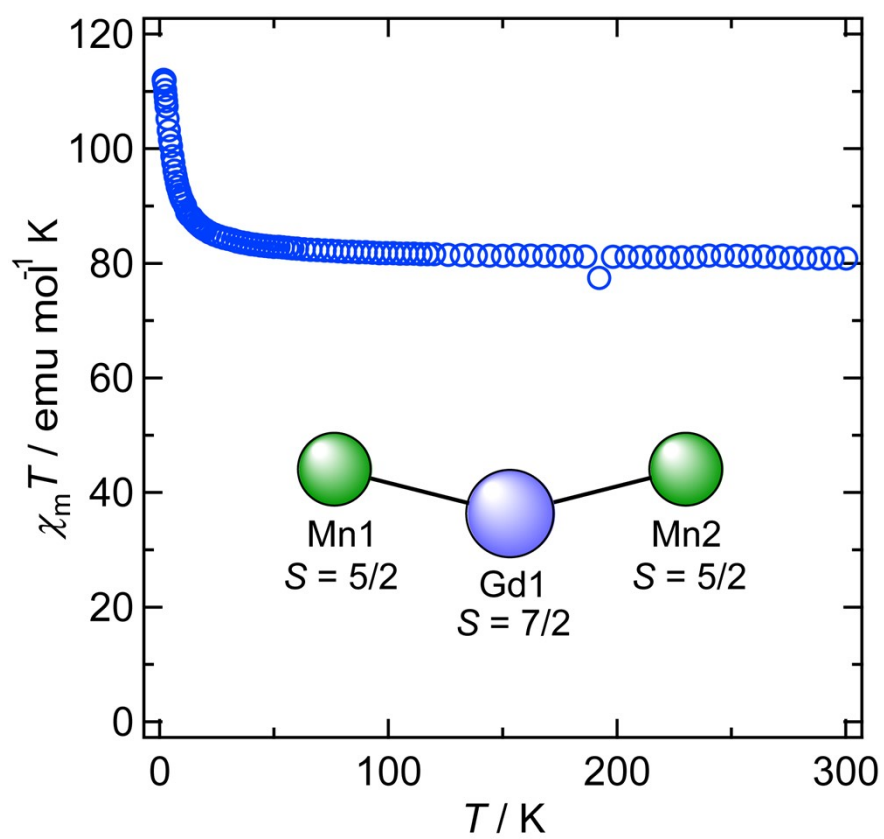

**Figure S3.** The  $\chi_m T$  versus  $T$  plots of complex 2'.

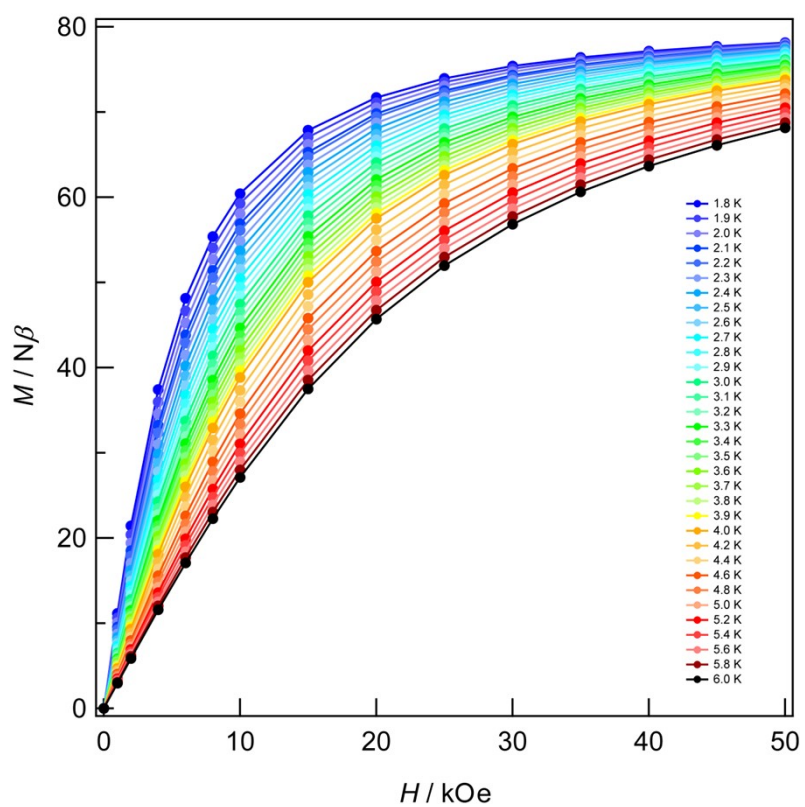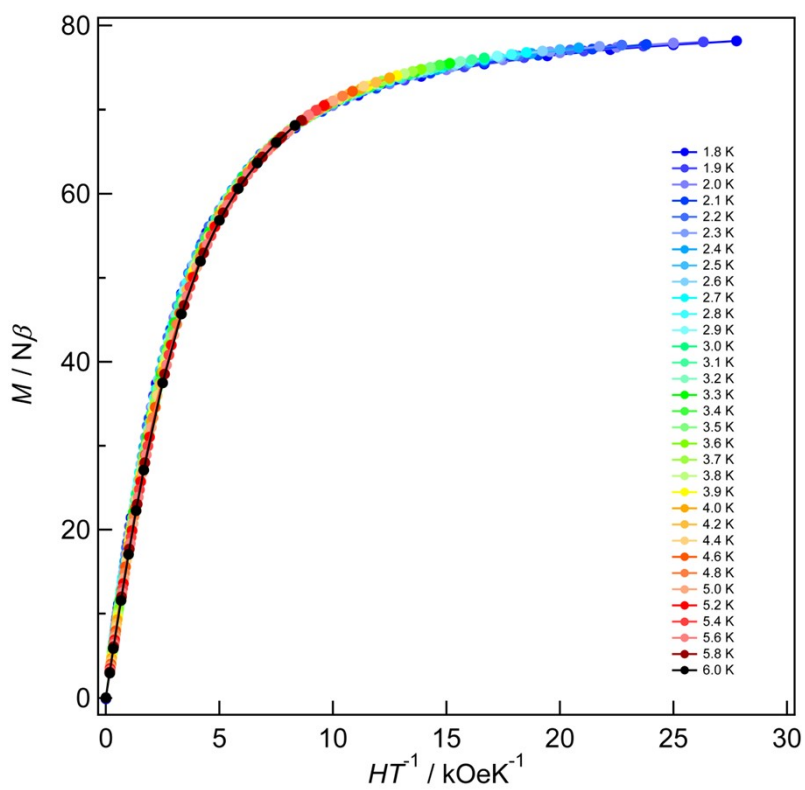

**Figure S4.** Field dependences of magnetization for  $2'$  (top) and the reduced magnetization curves (bottom).

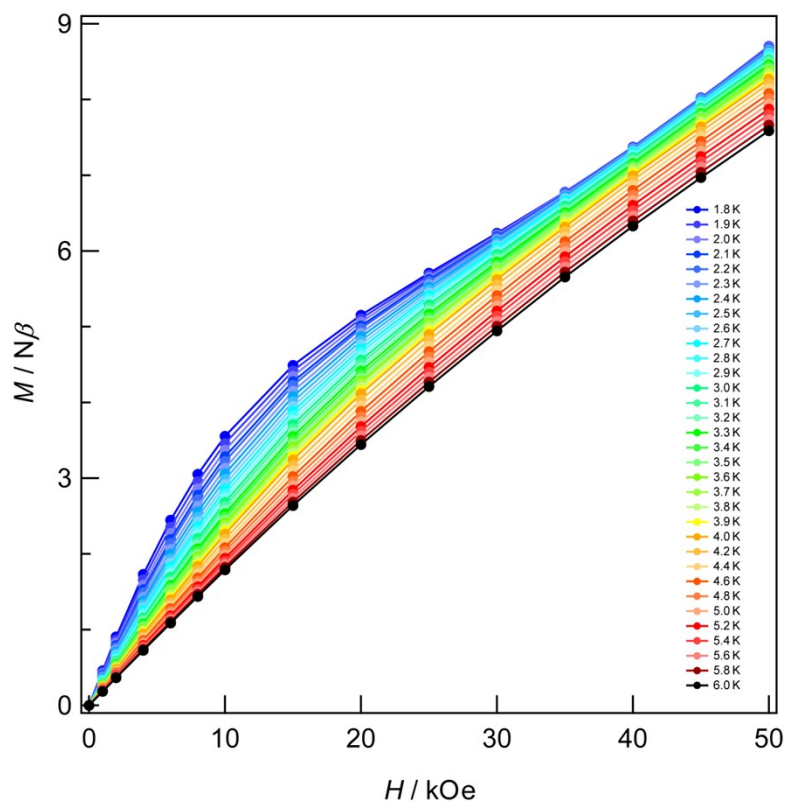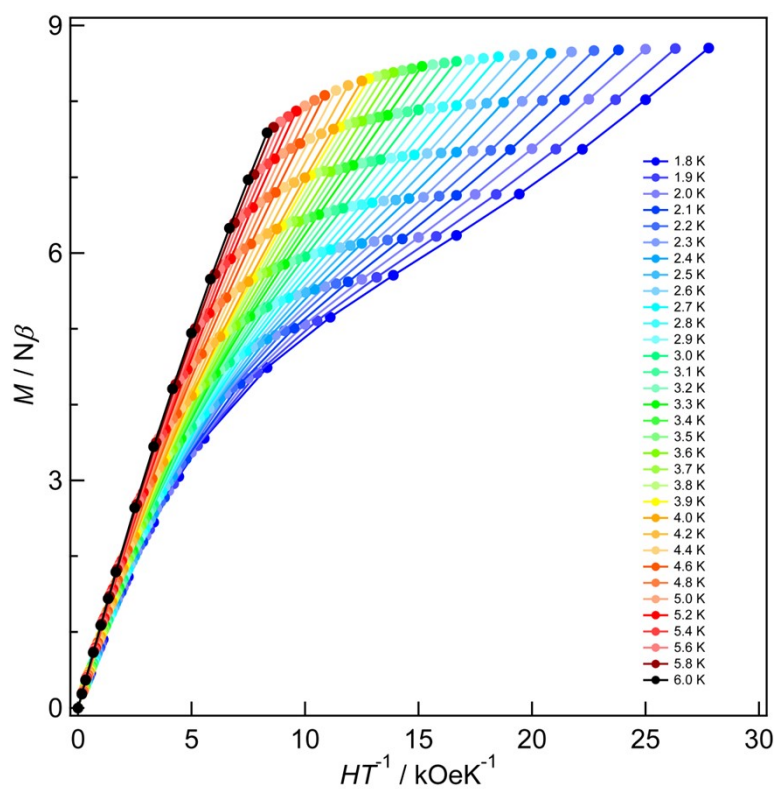

**Figure S5.** Field dependences of magnetization for  $3'$  (top) and the reduced magnetization curves (bottom).

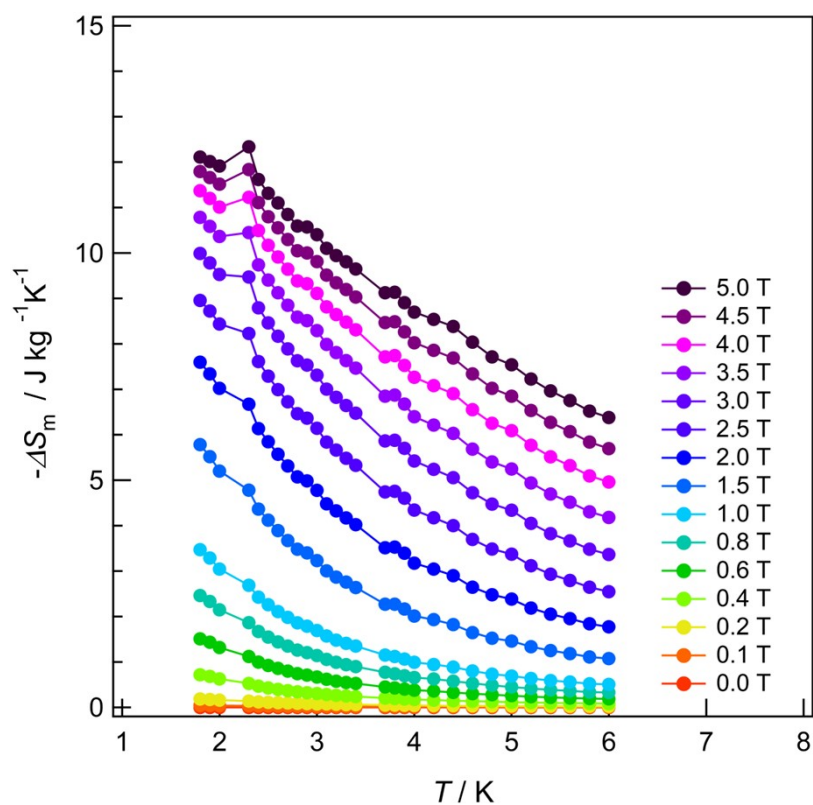

**Figure S6.** Calculated  $-\Delta S_m$  over a range of fields for **1'**. The maximum value is  $12.3 \text{ J kg}^{-1} \text{ K}^{-1}$ , calculated for 0 – 5 T at 2.3 K.

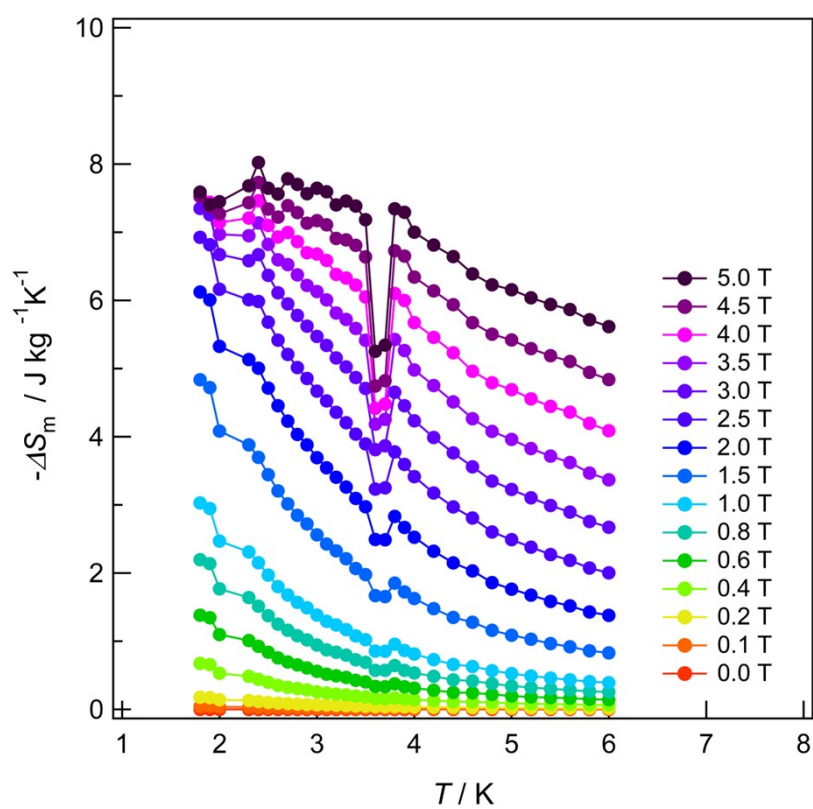

**Figure S7.** Calculated  $-\Delta S_m$  over a range of fields for **3'**. The maximum value is  $8.0 \text{ J kg}^{-1} \text{ K}^{-1}$ , calculated for 0 – 5 T at 2.4 K.



**Table S1** Representative 3d-4f complexes exhibiting large  $-\Delta S_m$  values.

|                                    | $-\Delta S_m$ (J kg <sup>-1</sup> K <sup>-1</sup> ) | $\Delta H$ (T) | $T_{max}$ (K) | Ref.       |
|------------------------------------|-----------------------------------------------------|----------------|---------------|------------|
| MnGd                               | 23.5                                                | 7              | 2.7           | 1          |
| Mn <sub>2</sub> Gd                 | 24.8                                                | 5              | 2.4           | This study |
| Co <sub>3</sub> Dy                 | 12.6                                                | 7              | 5             | 2          |
| Cr <sub>2</sub> Gd <sub>3</sub>    | 28.7                                                | 9              | 2.2           | 3          |
| Co <sub>4</sub> Gd <sub>2</sub>    | 20.0                                                | 7              | 3             | 4          |
| Mn <sub>4</sub> Gd <sub>4</sub>    | 19.0                                                | 7              | 4             | 5          |
| Mn <sub>4</sub> Gd <sub>6</sub>    | 33.7                                                | 7              | 3             | 6          |
| Ni <sub>6</sub> Gd <sub>6</sub>    | 26.5                                                | 7              | 3             | 7          |
| Co <sub>6</sub> Gd <sub>8</sub>    | 28.6                                                | 7              | 3             | 4          |
| Mn <sub>9</sub> Gd <sub>9</sub>    | 28.0                                                | 7              | 3             | 6          |
| Mn <sub>12</sub> Gd <sub>6</sub>   | 15.8                                                | 7              | 6             | 8          |
| Ni <sub>12</sub> Gd <sub>36</sub>  | 36.3                                                | 7              | 3             | 9          |
| Co <sub>12</sub> Gd <sub>30</sub>  | 44.7                                                | 7              | 1             | 10         |
| Co <sub>10</sub> Gd <sub>42</sub>  | 41.3                                                | 7              | 2             | 11         |
| Ni <sub>10</sub> Gd <sub>42</sub>  | 38.2                                                | 7              | 2             | 11         |
| Co <sub>7</sub> Gd <sub>42</sub>   | 40.5                                                | 7              | 2             | 12         |
| Ni <sub>7</sub> Gd <sub>42</sub>   | 38.4                                                | 7              | 2             | 12         |
| Ni <sub>56</sub> Gd <sub>52</sub>  | 40.5                                                | 7              | 3             | 13         |
| Ni <sub>36</sub> Gd <sub>102</sub> | 41.3                                                | 7              | 2             | 14         |
| Ni <sub>64</sub> Gd <sub>78</sub>  | 40.6                                                | 7              | 3             | 15         |
| Ni <sub>64</sub> Gd <sub>96</sub>  | 42.8                                                | 7              | 3             | 16         |

**Table S2.** Crystal parameters of **1**, **2** and **3**.

|                                                      | Comp. 1                                                                                        | Comp. 2                                                                                                  | Comp. 3                                                                               |
|------------------------------------------------------|------------------------------------------------------------------------------------------------|----------------------------------------------------------------------------------------------------------|---------------------------------------------------------------------------------------|
| Formula                                              | C <sub>74</sub> H <sub>64</sub> Mn <sub>2</sub> N <sub>19</sub> O <sub>32</sub> Y <sub>2</sub> | C <sub>98</sub> H <sub>79.50</sub> Gd <sub>3.50</sub> Mn <sub>3</sub> N <sub>30</sub> O <sub>63.50</sub> | C <sub>45.50</sub> H <sub>37.50</sub> Mn <sub>3</sub> N <sub>13</sub> O <sub>21</sub> |
| M / g mol <sup>-1</sup>                              | 2019.14                                                                                        | 3408.61                                                                                                  | 1267.20                                                                               |
| Temp. / K                                            | 100(2)                                                                                         | 100(2)                                                                                                   | 100(2)                                                                                |
| Crystal system                                       | Monoclinic                                                                                     | Orthorhombic                                                                                             | Triclinic                                                                             |
| Space group                                          | <i>P</i> 2 <sub>1</sub> / <i>n</i>                                                             | <i>P</i> ccn                                                                                             | <i>P</i> Error!                                                                       |
| <i>a</i> / Å                                         | 10.9358(17)                                                                                    | 61.336(16)                                                                                               | 13.930(5)                                                                             |
| <i>b</i> / Å                                         | 16.744(3)                                                                                      | 14.346(4)                                                                                                | 14.155(5)                                                                             |
| <i>c</i> / Å                                         | 47.214(8)                                                                                      | 29.106(8)                                                                                                | 16.875(6)                                                                             |
| $\alpha$ / °                                         | –                                                                                              | –                                                                                                        | 66.220(5)                                                                             |
| $\beta$ / °                                          | 94.178(2)                                                                                      | –                                                                                                        | 86.670(6)                                                                             |
| $\gamma$ / °                                         | –                                                                                              | –                                                                                                        | 89.503(6)                                                                             |
| <i>V</i> / Å <sup>3</sup>                            | 8622(2)                                                                                        | 25612(12)                                                                                                | 3039(2)                                                                               |
| <i>Z</i>                                             | 4                                                                                              | 8                                                                                                        | 2                                                                                     |
| <i>d</i> / g cm <sup>-3</sup>                        | 1.555                                                                                          | 1.768                                                                                                    | 1.385                                                                                 |
| $\mu$ / mm <sup>-1</sup>                             | 1.714                                                                                          | 2.185                                                                                                    | 0.694                                                                                 |
| F(000)                                               | 4096                                                                                           | 13476                                                                                                    | 1289                                                                                  |
| Reflections                                          |                                                                                                |                                                                                                          |                                                                                       |
| collected / unique                                   | 49084 / 19532                                                                                  | 144189 / 29346                                                                                           | 17186 / 13308                                                                         |
| <i>R</i> <sub>int</sub>                              | 0.1544                                                                                         | 0.0762                                                                                                   | 0.0627                                                                                |
| GOF                                                  | 1.090                                                                                          | 1.147                                                                                                    | 1.074                                                                                 |
| <i>R</i> <sub>1</sub> ( <i>I</i> > 2σ( <i>I</i> ))   | 0.1247                                                                                         | 0.0810                                                                                                   | 0.1212                                                                                |
| <i>R</i> <sub>w</sub> 2 ( <i>I</i> > 2σ( <i>I</i> )) | 0.2982                                                                                         | 0.1858                                                                                                   | 0.3321                                                                                |
| $\Delta\rho_{\max}$ / e Å <sup>-3</sup>              | 2.088                                                                                          | 3.296                                                                                                    | 1.742                                                                                 |
| $\Delta\rho_{\min}$ / e Å <sup>-3</sup>              | –1.778                                                                                         | –2.579                                                                                                   | –1.568                                                                                |
| CCDC No.                                             | 2107790                                                                                        | 2107791                                                                                                  | 2107792                                                                               |

**Table S3** Selected bond lengths and angles for all complexes.

| <b>Complex 1</b> |               |                 |               |           |            |
|------------------|---------------|-----------------|---------------|-----------|------------|
| Mn1···N3         | 2.250(10) Å   | Mn2···O7        | 2.232(6) Å    | Y1···O4   | 2.254(7) Å |
| Mn1···O12        | 2.260(8) Å    | Mn2···O15       | 2.272(7) Å    | Y1···O2   | 2.308(7) Å |
| Mn1···O9         | 2.265(8) Å    | Mn2···O5        | 2.305(8) Å    | Y1···O6   | 2.322(7) Å |
| Mn1···O3         | 2.273(7) Å    | Mn2···N5        | 2.306(8) Å    | Y1···O7   | 2.341(7) Å |
| Mn1···N1         | 2.280(10) Å   | Mn2···N2        | 2.344(8) Å    | Y1···O3   | 2.356(7) Å |
| Mn1···O1         | 2.317(7) Å    | Mn2···N7        | 2.346(9) Å    | Y1···O8   | 2.358(7) Å |
| Mn1···O10        | 2.474(9) Å    | Mn2···O2        | 2.384(7) Å    | Y1···O1   | 2.370(6) Å |
| Mn1···O13        | 2.488(8) Å    | Mn2···O16       | 2.395(8) Å    | Y1···O5   | 2.413(6) Å |
| Mn1···O1···Y1    | 107.6(3) deg. | Mn2···O5···Y1   | 98.7(2) deg.  |           |            |
| Mn1···O3···Y1    | 109.6(3) deg. | Mn2···O7···Y1   | 103.0(2) deg. |           |            |
| <b>Complex 2</b> |               |                 |               |           |            |
| Mn1···N1         | 2.239(9) Å    | Mn3···O25       | 2.230(12) Å   | Gd1···O6  | 2.355(7) Å |
| Mn1···N3         | 2.249(9) Å    | Mn3···N9        | 2.271(13) Å   | Gd1···O2  | 2.375(6) Å |
| Mn1···O13        | 2.270(7) Å    | Mn3···O9        | 2.310(8) Å    | Gd1···O8  | 2.377(6) Å |
| Mn1···O16        | 2.271(8) Å    | Mn3···O26       | 2.486(12) Å   | Gd1···O4  | 2.377(6) Å |
| Mn1···O3         | 2.276(7) Å    |                 |               | Gd1···O7  | 2.383(6) Å |
| Mn1···O1         | 2.331(6) Å    |                 |               | Gd1···O1  | 2.402(6) Å |
| Mn1···O17        | 2.432(8) Å    |                 |               | Gd1···O5  | 2.410(6) Å |
| Mn1···O14        | 2.575 Å       |                 |               | Gd1···O3  | 2.415(6) Å |
| Mn2···O22        | 2.216(7) Å    | Mn4···O28       | 2.243(11) Å   | Gd2···O10 | 2.353(9) Å |
| Mn2···N5         | 2.284(8) Å    | Mn4···N11       | 2.273(9) Å    | Gd2···O9  | 2.363(8) Å |
| Mn2···O19        | 2.285(7) Å    | Mn4···O11       | 2.303(7) Å    | Gd2···O12 | 2.375(7) Å |
| Mn2···O5         | 2.285(6) Å    | Mn4···O29       | 2.510(9) Å    | Gd2···O11 | 2.386(7) Å |
| Mn2···O7         | 2.302(6) Å    |                 |               |           |            |
| Mn2···N7         | 2.302(8) Å    |                 |               |           |            |
| Mn2···O20        | 2.421(7) Å    |                 |               |           |            |
| Mn2···O23        | 2.581 Å       |                 |               |           |            |
| Mn1···O1···Gd1   | 107.5(3) deg. | Mn2···O5···Gd1  | 110.1(3) deg. |           |            |
| Mn1···O3···Gd1   | 108.9(3) deg. | Mn2···O7···Gd1  | 110.5(3) deg. |           |            |
| Mn3···O9···Gd2   | 110.1(4) deg. | Mn4···O11···Gd2 | 108.9(3) deg. |           |            |
| <b>Complex 3</b> |               |                 |               |           |            |
| Mn1···O3         | 2.249(6) Å    | Mn2···O4        | 2.104(6) Å    | Mn3···O13 | 2.245(6) Å |
| Mn1···O7         | 2.257(7) Å    | Mn2···O6        | 2.142(5) Å    | Mn3···N2  | 2.258(6) Å |
| Mn1···O10        | 2.274(6) Å    | Mn2···O1        | 2.154(5) Å    | Mn3···O5  | 2.267(5) Å |
| Mn1···N1         | 2.280(7) Å    | Mn2···O2        | 2.161(5) Å    | Mn3···O16 | 2.271(6) Å |
| Mn1···N3         | 2.290(8) Å    | Mn2···O5        | 2.189(5) Å    | Mn3···N5  | 2.272(7) Å |
| Mn1···O1         | 2.316(5) Å    | Mn2···O3        | 2.192(5) Å    | Mn3···O2  | 2.279(5) Å |
| Mn1···O11        | 2.398(7) Å    |                 |               | Mn3···O17 | 2.388(7) Å |
| Mn1···O8         | 2.435(6) Å    |                 |               | Mn3···O14 | 2.63 Å     |
| Mn1···O1···Mn2   | 108.3(2) deg. | Mn2···O2···Mn3  | 107.9(2) deg. |           |            |
| Mn1···O3···Mn2   | 109.4(2) deg. | Mn2···O5···Mn3  | 107.4(2) deg. |           |            |

**Table S4** Bond valence sum calculations for all complexes.

|                  | Mn1          | Mn2          | Mn3          | Mn4          |
|------------------|--------------|--------------|--------------|--------------|
| <b>Complex 1</b> |              |              |              |              |
| Mn(II)           | <b>2.052</b> | <b>2.062</b> |              |              |
| Mn(III)          | 1.892        | 1.902        |              |              |
| Mn(IV)           | 1.857        | 1.866        |              |              |
| <b>Complex 2</b> |              |              |              |              |
| Mn(II)           | <b>2.055</b> | <b>2.015</b> | <b>2.066</b> | <b>2.032</b> |
| Mn(III)          | 1.895        | 1.858        | 1.906        | 1.874        |
| Mn(IV)           | 1.859        | 1.824        | 1.870        | 1.839        |
| <b>Complex 3</b> |              |              |              |              |
| Mn(II)           | <b>2.090</b> | <b>2.233</b> | <b>2.082</b> |              |
| Mn(III)          | 1.927        | 2.059        | 1.920        |              |
| Mn(IV)           | 1.891        | 2.02         | 1.884        |              |

Explanation of alerts in CIFCHECK:

**Datablock: Comp1**  
**Alert Level B**

The following B-level alerts arise from the diffraction data being slightly weak.

**PLAT220\_ALERT\_2\_B NonSolvent Resd 1 C Ueq(max)/Ueq(min) Range 6.8 Ratio**

The following B-level alerts arise from the atom O25 belong to coordinating nitrate ion, which is weakly bonding to Mn ion.

**PLAT241\_ALERT\_2\_B High 'MainMol' Ueq as Compared to Neighbors of O25 Check**

The following B-level alerts arise from the disorder of solvent molecule (p-Xylene).

**PLAT315\_ALERT\_2\_B Singly Bonded Carbon Detected (H-atoms Missing). C74 Check**

The following B-level alerts arise from the diffraction data being slightly weak.

**PLAT341\_ALERT\_3\_B Low Bond Precision on C-C Bonds ..... 0.02191 Ang.**

**Datablock: Comp2**  
**Alert Level B**

The following B-level alerts arise from the diffraction data being slightly weak.

**PLAT230\_ALERT\_2\_B Hirshfeld Test Diff for O44 --N23 . 10.8 s.u.**

**PLAT230\_ALERT\_2\_B Hirshfeld Test Diff for O45 --N23 . 11.2 s.u.**

**PLAT234\_ALERT\_4\_B Large Hirshfeld Difference O58 --N28 . 0.28 Ang.**

The following B-level alerts arise from the atoms O55, O56, N23 belong to coordinating nitrate ion, which is weakly bonding to Mn ion.

**PLAT241\_ALERT\_2\_B High 'MainMol' Ueq as Compared to Neighbors of O55 Check**

**PLAT241\_ALERT\_2\_B High 'MainMol' Ueq as Compared to Neighbors of O56 Check**

**PLAT241\_ALERT\_2\_B High 'MainMol' Ueq as Compared to Neighbors of N23 Check**

The following B-level alerts arise from the disordered solvent molecules.

**PLAT260\_ALERT\_2\_B Large Average Ueq of Residue Including O65 0.353 Check**

**PLAT306\_ALERT\_2\_B Isolated Oxygen Atom (H-atoms Missing ?) ..... O65 Check**

**PLAT315\_ALERT\_2\_B Singly Bonded Carbon Detected (H-atoms Missing). C96 Check**

**PLAT430\_ALERT\_2\_B Short Inter D...A Contact O62 ..O67 . 2.78 Ang. x,y,z = 1\_555 Check**

The following B-level alerts arise from the diffraction data being slightly weak.

**PLAT601\_ALERT\_2\_B Unit Cell Contains Solvent Accessible VOIDS of . 120 Ang\*\*3**

**PLAT780\_ALERT\_1\_B Coordinates do not Form a Properly Connected Set Please Do !**

**PLAT919\_ALERT\_3\_B Reflection # Likely Affected by the Beamstop ... 1 Check**

**PLAT971\_ALERT\_2\_B Check Calcd Resid. Dens. 0.07A From N23 3.29 eA-3**

**PLAT972\_ALERT\_2\_B Check Calcd Resid. Dens. 0.24A From O62 -2.57 eA-3**

**PLAT973\_ALERT\_2\_B Check Calcd Positive Resid. Density on Gd3 1.51 eA-3**

**Datablock: Comp3**  
**Alert Level B**

The following B-level alerts arise from the diffraction data being slightly weak.

**PLAT084\_ALERT\_3\_B High wR2 Value (i.e. > 0.25) ..... 0.37 Report**

**PLAT213\_ALERT\_2\_B Atom C11 has ADP max/min Ratio ..... 4.1 prolat**

**PLAT213\_ALERT\_2\_B Atom C27 has ADP max/min Ratio ..... 4.1 prolat**

The lattice solvent molecule is disordered.

**PLAT601\_ALERT\_2\_B Unit Cell Contains Solvent Accessible VOIDS of . 168 Ang\*\*3**

**References**

- 1 E. Colacio, J. Ruiz, G. Lorusso, E. K. Brechin and M. Evangelisti, *Chem. Commun.*, **2013**, 49, 3845.
- 2 P. Wang, S. Shannigrahi, N. L. Yakovlev and T. S. A. Hor., *Inorg. Chem.*, **2012**, 51, 12059.
- 3 T. Birk, K. S. Pedersen, C. Aa. Thuesen, T. Weyhermüller, M. Schau-Magnussen, S. Piligkos, H. Weihe, S. Mossin, M. Evangelisti and J. Bendix, *Inorg. Chem.*, **2012**, 51, 5435.
- 4 Y.-Z. Zheng, M. Evangelisti, F. Tuna and R. E. P. Winpenny, *J. Am. Chem. Soc.*, **2012**, 134, 1057.
- 5 G. Karotsis, M. Evangelisti, S. J. Dalgarno and E. K. Brechin, *Angew. Chem., Int. Ed.*, **2009**, 48, 9928.
- 6 Y.-Z. Zheng, E. M. Pineda, M. Helliwell and R. E. P. Winpenny, *Chem.–Eur. J.*, **2012**, 18, 15086.
- 7 Y.-Z. Zheng, M. Evangelisti and R. E. P. Winpenny, *Angew. Chem., Int. Ed.*, **2011**, 50, 3692.
- 8 J.-L. Liu, W.-Q. Lin, Y.-C. Chen, J.-D. Leng, F.-S. Guo and M.-L. Tong, *Inorg. Chem.*, **2013**, 52, 457.
- 9 J. B. Peng, Q. C. Zhang, X. J. Kong, Y. P. Ren, L. S. Long, R. B. Huang, L. S. Zheng and Z. Zheng, *Angew. Chem., Int. Ed.*, **2011**, 50, 10649.
- 10 H.-J. Lun, L. Xu, X.-J. Kong, L.-S. Long, L.-S. Zheng, *Inorg. Chem.*, **2021**, 60, 10079.
- 11 J. B. Peng, Q. C. Zhang, X. J. Kong, Y. Z. Zheng, Y. P. Ren, L. S. Long, R. B. Huang, L. S. Zheng and Z. Zheng, *J. Am. Chem. Soc.*, **2012**, 134, 3314.
- 12 S. Fan, S.-H. Xu, X.-Y. Zheng, Z.-H. Yan, X.-J. Kong, L.-S. Long, L.-S. Zheng, *CrystEngComm.*, **2018**, 20, 2120.
- 13 D.-P. Liu, X.-P. Lin, H. Zhang, X.-Y. Zheng, G.-L. Zhuang, X.-J. Kong, L.-S. Long, L.-S. Zheng, *Angew. Chem. Int. Ed.*, **2016**, 55, 4532.
- 14 W.-P. Chen, P.-Q. Liao, P.-B. Jin, L. Zhang, B.-K. Ling, S.-C. Wang, Y.-T. Chan, X.-M. Chen, Y.-Z. Zheng, *J. Am. Chem. Soc.*, **2020**, 142, 4663.
- 15 Q.-F. Lin, J. Li, X.-M. Luo, C.-H. Cui, Y. Song, Y. Xu, *Inorg. Chem.*, **2018**, 57, 4799.
- 16 W.-P. Chen, P.-Q. Liao, Y. Yu, Z. Zheng, X.-M. Chen, Y.-Z. Zheng, *Angew. Chem. Int. Ed.*, **2016**, 55, 9375.
